# Supplementary material for: Non-OH chemistry in oxidation flow reactors for the study of atmospheric chemistry systematically examined by modeling
Source: Copernicus journal article supplement (doi:10.5194/acp-16-4283-2016), 2016-04-06
Supplement: Supplementary file 1 [file acp-16-4283-2016-supplement.zip]

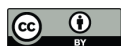

*Supplement of*

## **Non-OH chemistry in oxidation flow reactors for the study of atmospheric chemistry systematically examined by modeling**

**Zhe Peng et al.**

*Correspondence to:* Jose L. Jimenez ([jose.jimenez@colorado.edu](mailto:jose.jimenez@colorado.edu))

- [acp-16-4283-2016-supplement-title-page.pdf](#)
- [OFR\\_Exposure\\_Estimator.xlsx](#)
- [Supplement.pdf](#)

The copyright of individual parts of the supplement might differ from the CC-BY 3.0 licence.
