# Supplementary material for: Non-OH chemistry in oxidation flow reactors for the study of atmospheric chemistry systematically examined by modeling
Source: Copernicus journal article supplement (doi:10.5194/acp-16-4283-2016), 2016-04-06
Supplement: Supplementary file 1 [file OFR_Exposure_Estimator.xlsx]

## Sheet: Sheet1
	Oxidation Flow Reactor (OFR) exposure estimator (v2)
		a) Based on estimation equations in:
			i) Li et al. J. Phys. Chem. A, 2015, 119, 4418;						http://pubs.acs.org/doi/abs/10.1021/jp509534k
			ii) Peng et al. Atoms. Meas. Tech., 2015, 8, 4863;						http://www.atmos-meas-tech.net/8/4863/2015/
			iii) Peng et al. Atmos. Chem. Phys., 2016, in press.						http://www.atmos-chem-phys-discuss.net/15/23543/2015/
			Due to a typo in the earlier papers, only the equations of Peng et al. (2016) should be used.
			A formal correction will be published correcting the typo on the earlier papers.
		b) Residence time also included as input.
		c) Equations and ppb conversions are derived for pressure in Boulder, CO, USA (835 mbar) and 22C (295K). Changes for sea level pressure
		or other temperatures are ~10-20% (see Fig. 6 in Li et al., JPCA 2015), which is smaller than the expected accuracy of these estimation
		equations.
		d) These equations assume plug flow. The effect of a different residence time distribution can be estimated by running the spreadsheet
		for several residence times and calculating the weighed average of the outputs. See also Peng et al. (2015).
		e) Enter values within the range noted for each input. Out-of-range inputs may lead to meaningless results or errors.
		f) These estimation equations have been developed for the 13 Liter PAM OFR, using 2 low-pressure Hg lamps (BHK model 82-9304-03),
		and with Teflon sleeves for OFR185 mode and quartz sleeves for OFR254 mode. The accuracy of the absolute exposures is expected to
		be about a factor of 3 for the identical setup and conditions. Individual lamps and reactor flow setups can vary, and the results from
		this spreadsheet should be taken as estimates. Calibration of OH exposure for your specific reactor is necessary for more accurate
		results for that variable. Because the exposures to different reactants are correlated, errors in exposure ratios should be lower. Without
		specific calibrations, and especially for reactors of other designs, results from this spreadsheet may be useful as semi-quantitative
		guidance for experimental design.
		g) Refer to Figs. 1-5 and 8 (and Figs. S1-S5) of Peng et al. ACP 2016 for guidance on evaluating whether (ratios between) exposures could
		be problematic.
		h) VOC fate by photolysis is calculated under the assumption of unity quantum yield to provide an upper limit.
		i) Condition type, classified according to physical inputs (not outputs), does not perfectly delineate the relative importance of non-OH reactants.
		j) Output of relative exposures (OH/other) are colored green if OH dominates, change towards red as the other species dominates. The
		goals of specific experiments may be different.
		k) For O(1D), O(3P), and O3, the TEXT output is colored compared to typical ambient ratios (green if within 1 order of magnitude of
		ambient, yellow otherwise).
		l) Questions? Email zhe.peng@colorado.edu, zhe.peng0401@gmail.com, or jose.jimenez@colorado.edu.
		m) This spreadsheet is password-protected to avoid inadvertent changes. Password to unprotect: ofree
		n) Updates to this spreadsheet will be published in the PAM Wiki at:							https://sites.google.com/site/pamwiki/hardware/estimation-equations
		o) An IGOR version is forthcoming, that will allow easier operation on time series of inputs. Please email us if this version if of high interest to you.
	Common inputs															Legend
	Water vapor mixing ratio (unitless)						External OH reactivity						Residence time			Input		Condition type	OFR185			OFR254
	(0.0007–0.023)						(1–1000 s-1)						(10–1000 s)			Output		Safer	water mixing ratio>0.8% and external			water mixing ratio>0.5% and external
	0.0145414						22.337		s-1				180	s					OH reactivity<30 s-1 and photon flux at			OH reactivity<50 s-1
	Relative humidity						A given species as external OH reactant												185 nm>1E+12 photons cm-2 s-1
	(not used elsewhere in spreadsheet)						(not used elsewhere in spreadsheet)											Riskier	water mixing ratio<0.1% or external OH			water mixing ratio<0.1% or external OH
	0.451232						Rate constant of reaction with OH												reactivity≥100 s-1			reactivity>200 s-1
							9.185e-13			cm3 molecule-1 s-1								Transition	other conditions			other conditions
							Concentration											* According to the definition of condition types in Peng et al. ACP 2016
							2.4319e+13	molecules cm-3		1184.51	ppb
	OFR185
	If photon flux at 185 is known						Outputs
	Photon flux at 185 nm						OH exposure				Exposure ratios			VOC fate [fate by non-OH reactant / (fate by non-OH reactant + fate by OH)]
	(1E+11–1E+14 photons cm-2 s-1)						1.62432e+11		molecules cm-3 s					Non-OH reactant - VOC
	1743330000000			photons cm-2 s-1			185 nm photon flux exposure				185 nm photon flux / OH			185 nm photon - benzene			185 nm photon - methylethylketone			185 nm photon - limonene
							313799400000000		photons cm-2		1931.89		cm s-1	0.0407105	Very minor		0.00207011	Very minor		0.000539224	Very minor
							254 nm photon flux exposure				254 nm photon flux / OH			254 nm photon - acetylacetone			254 nm photon - toluene			254 nm photon - glyoxal
							6.77852e+16		photons cm-2		417315		cm s-1	0.158085	Significant		0.016691	Very minor		0.000602847	Very minor
				Condition type			O(1D) exposure				O(1D) / OH			O(1D) - methane			O(1D) - ethane			O(1D) - isoprene
				Safer			7600.81		molecules cm-3 s		4.67939e-08			0.00109553	Lower than ambient value		9.99932e-05	Lower than ambient value		4.96015e-07	Lower than ambient value
							O(3P) exposure				O(3P) / OH			O(3P) - isoprene			O(3P) - ethene			O(3P) - benzene
							4.01874e+08		molecules cm-3 s		0.00247411			0.00136385	Comparable to ambient value		0.000210488	Comparable to ambient value		4.03548e-05	Comparable to ambient value
							O3 exposure				O3 / OH			O3 - α-terpinene			O3 - α-pinene			O3 - isoprene
							1502567712072699		molecules cm-3 s		9250.46			0.348598	Lower than ambient value		0.0146398	Lower than ambient value		0.00117343	Lower than ambient value
		OR
	If output O3 concentration (~x2						Outputs
	average O3 concentration) is known						OH exposure				Exposure ratios			VOC fate [fate by non-OH reactant / (fate by non-OH reactant + fate by OH)]
	Output O3 concentration						1.59722e+11		molecules cm-3 s					Non-OH reactant - VOC
	(5E+11–2E+15 molecules cm-3)						185 nm photon flux exposure				185 nm photon flux / OH			185 nm photon - benzene			185 nm photon - methylethylketone			185 nm photon - limonene
	16418800000000			molecules cm-3			2.77674e+14		photons cm-2		1738.48		cm s-1	0.0367848	Very minor		0.00186325	Very minor		0.000485268	Very minor
	0.799712			ppm			254 nm photon flux exposure				254 nm photon flux / OH			254 nm photon - acetylacetone			254 nm photon - toluene			254 nm photon - glyoxal
							5.99799e+16		photons cm-2		375527		cm s-1	0.144543	Minor		0.0150448	Very minor		0.000542513	Very minor
							O(1D) exposure				O(1D) / OH			O(1D) - methane			O(1D) - ethane			O(1D) - isoprene
							7374.31		molecules cm-3 s		4.61697e-08			0.00108093	Lower than ambient value		9.86594e-05	Lower than ambient value		4.89399e-07	Lower than ambient value
				Condition type			O(3P) exposure				O(3P) / OH			O(3P) - isoprene			O(3P) - ethene			O(3P) - benzene
				Safer			3.93467e+08		molecules cm-3 s		0.00246345			0.00135798	Comparable to ambient value		0.000209581	Comparable to ambient value		4.01809e-05	Comparable to ambient value
							O3 exposure				O3 / OH			O3 - α-terpinene			O3 - α-pinene			O3 - isoprene
							1477692000000000		molecules cm-3 s		9251.66			0.348627	Lower than ambient value		0.0146417	Lower than ambient value		0.00117358	Lower than ambient value
	OFR254
	Initial O3 concentration
	(7–70 ppm)
	17.5832		ppm									0.900412
	If photon flux at 254 is known						Outputs
	Photon flux at 254 nm						OH exposure				Exposure ratios			VOC fate [fate by non-OH reactant / (fate by non-OH reactant + fate by OH)]
	(4E+13–9E+15 photon cm-2 s-1)						5.43622e+11		molecules cm-3 s					Non-OH reactant - VOC
	180818000000000			photons cm-2 s-1			254 nm photon flux exposure				254 nm photon flux / OH			254 nm photon - acetylacetone			254 nm photon - toluene			254 nm photon - glyoxal
							3.25472e+16		photons cm-2		59871.1		cm s-1	0.026232	Very minor		0.00242934	Very minor		8.65334e-05	Very minor
							O(1D) exposure				O(1D) / OH			O(1D) - methane			O(1D) - ethane			O(1D) - isoprene
							236835		molecules cm-3 s		4.3566e-07			0.0101076	Lower than ambient value		0.000930182	Lower than ambient value		4.61798e-06	Lower than ambient value
				Condition type			O(3P) exposure				O(3P) / OH			O(3P) - isoprene			O(3P) - ethene			O(3P) - benzene
				Safer			1.99001e+09		molecules cm-3 s		0.00366064			0.0020166	Comparable to ambient value		0.000311401	Comparable to ambient value		5.97069e-05	Comparable to ambient value
							O3 exposure				O3 / OH			O3 - α-terpinene			O3 - α-pinene			O3 - isoprene
							6.09439e+16		molecules cm-3 s		112107			0.866409	Comparable to ambient value		0.152583	Comparable to ambient value		0.0140377	Comparable to ambient value
		OR
	If ratio between input						Outputs
	and output O3 (rO3) is known						OH exposure				Exposure ratios			VOC fate [fate by non-OH reactant / (fate by non-OH reactant + fate by OH)]
	rO3						5.65211e+11		molecules cm-3 s					Non-OH reactant - VOC
	(0.02–0.99)						254 nm photon flux exposure				254 nm photon flux / OH			254 nm photon - acetylacetone			254 nm photon - toluene			254 nm photon - glyoxal
	0.896669						4.28972e+16		photons cm-2		75895.9		cm s-1	0.0330213	Very minor		0.00307756	Very minor		0.000109692	Very minor
							O(1D) exposure				O(1D) / OH			O(1D) - methane			O(1D) - ethane			O(1D) - isoprene
							250946		molecules cm-3 s		4.43986e-07			0.0102988	Lower than ambient value		0.000947943	Lower than ambient value		4.70623e-06	Lower than ambient value
							O(3P) exposure				O(3P) / OH			O(3P) - isoprene			O(3P) - ethene			O(3P) - benzene
							2.10857e+09		molecules cm-3 s		0.0037306			0.00205506	Comparable to ambient value		0.00031735	Comparable to ambient value		6.08479e-05	Comparable to ambient value
							O3 exposure				O3 / OH			O3 - α-terpinene			O3 - α-pinene			O3 - isoprene
							6.08371e+16		molecules cm-3 s		107636			0.861628	Comparable to ambient value		0.147395	Comparable to ambient value		0.0134855	Comparable to ambient value
